# Supplementary material for: The Influence of Carbon Cycling on Oxygen Depletion in North-Temperate Lakes
Source: Copernicus journal article supplement (doi:10.5194/egusphere-2023-22), 2023-01-11
Supplement: Supplementary file 1 [file egusphere-2023-22-supplement.pdf]

## Supplemental Material

These materials provide support for the manuscript. The tables include detailed information on model configuration and model fit metrics. The additional figures provide information related to the analysis and discussion of topics in the manuscript.

### TABLES

**Supplemental Table 1.** RMSE values for epilimnetic DO, hypolimnetic DO, epilimnetic DOC, and Secchi Depth. Values are separated into calibration (1995-2009), validation (2010-2014), and full time series (1995-2014).

| Lake / Variable                             | RMSE Calibration | RMSE Validation | RMSE Full Time Series |
|---------------------------------------------|------------------|-----------------|-----------------------|
| <b>DO<sub>epi</sub> (g m<sup>-3</sup>)</b>  |                  |                 |                       |
|                                             |                  |                 |                       |
| ME                                          | 2.16             | 1.94            | 2.11                  |
| MO                                          | 1.96             | 1.94            | 1.95                  |
| TR                                          | 0.75             | 0.70            | 0.73                  |
| AL                                          | 1.77             | 1.66            | 1.74                  |
| BM                                          | 0.95             | 0.86            | 0.93                  |
| SP                                          | 0.95             | 1.10            | 0.99                  |
|                                             |                  |                 |                       |
| <b>DO<sub>hypo</sub> (g m<sup>-3</sup>)</b> |                  |                 |                       |
|                                             |                  |                 |                       |
| ME                                          | 1.45             | 1.23            | 1.40                  |
| MO                                          | 1.74             | 1.80            | 1.76                  |
| TR                                          | 1.15             | 1.33            | 1.20                  |
| AL                                          | 2.72             | 2.61            | 2.69                  |
| BM                                          | 1.70             | 2.10            | 1.80                  |
| SP                                          | 1.96             | 2.70            | 2.15                  |
|                                             |                  |                 |                       |

|                                    |      |      |      |
|------------------------------------|------|------|------|
| <b>DOC_epi (g m<sup>-3</sup>)</b>  |      |      |      |
|                                    |      |      |      |
| ME                                 | 0.98 | 1.69 | 1.18 |
| MO                                 | 0.97 | 1.30 | 1.04 |
| TR                                 | 0.26 | 0.33 | 0.28 |
| AL                                 | 0.55 | 0.72 | 0.60 |
| BM                                 | 0.53 | 0.61 | 0.55 |
| SP                                 | 0.44 | 0.61 | 0.48 |
|                                    |      |      |      |
| <b>DOC_hypo (g m<sup>-3</sup>)</b> |      |      |      |
|                                    |      |      |      |
| ME                                 | 0.80 | 1.19 | 0.92 |
| MO                                 | 1.30 | 0.68 | 1.18 |
| TR                                 | 0.33 | 0.29 | 0.32 |
| AL                                 | 0.61 | 0.70 | 0.63 |
| BM                                 | 0.60 | 0.51 | 0.58 |
| SP                                 | 0.60 | 0.43 | 0.57 |
|                                    |      |      |      |
| <b>Secchi (m)</b>                  |      |      |      |
|                                    |      |      |      |
| ME                                 | 2.42 | 2.64 | 2.48 |
| MO                                 | 2.03 | 1.80 | 1.98 |
| TR                                 | 0.56 | 0.90 | 0.65 |
| AL                                 | 0.48 | 0.80 | 0.57 |
| BM                                 | 0.62 | 0.88 | 0.69 |
| SP                                 | 0.77 | 1.55 | 1.01 |

**Supplemental Table 2.** Results from a Mann-Kendall trend analysis on lake NPP and average summer epilimnetic (epi) total phosphorus concentration (TP) for each lake. Z score and P-values are both shown. *p*-values less than 0.1 were considered significant.

| Lake | NPP Z score | NPP <i>p</i> -value | Epi TP Z score | Epi TP <i>p</i> -value |
|------|-------------|---------------------|----------------|------------------------|
| ME   | -2.63       | <b>0.01</b>         | -1.85          | <b>0.06</b>            |
| MO   | -1.07       | 0.28                | -0.94          | 0.35                   |
| TR   | 0.30        | 0.77                | -0.30          | 0.77                   |
| AL   | -1.14       | 0.26                | -2.70          | <b>0.01</b>            |
| BM   | 0.30        | 0.77                | 0.16           | 0.87                   |
| SP   | 0.95        | 0.35                | 0.49           | 0.63                   |

**Supplemental Table 3** OC average annual budget table for each lake. Allochthonous OC (oc\_alloch) and autochthonous OC (oc\_auto) fluxes are sources for each system. OC burial (oc\_burial), OC export (oc\_export), sediment respiration (resp\_sed), and water column respiration (resp\_wc) are all fates of OC within each system. All fluxes are in units of  $gC\ m^{-2}\ year^{-1}$ .

| Lake | oc_alloch | oc_auto | oc_burial | oc_export | resp_sed | resp_wc |
|------|-----------|---------|-----------|-----------|----------|---------|
| ME   | 36.51     | 342.08  | 44.81     | 20.75     | 52.94    | 259.82  |
| MO   | 60.50     | 391.14  | 60.11     | 53.40     | 53.54    | 285.02  |
| TR   | 28.90     | 97.68   | 11.13     | 7.80      | 24.30    | 83.38   |
| AL   | 31.63     | 71.16   | 27.13     | 22.45     | 15.17    | 37.90   |
| BM   | 13.65     | 48.84   | 3.37      | 5.51      | 14.22    | 39.37   |
| SP   | 12.77     | 62.64   | 1.87      | 3.80      | 18.60    | 51.47   |

**Supplemental Table 4** Fit values for the three free parameters in the model. These include the slope of the irradiance-productivity curve (IP), the respiration rate of sediment OC (R<sub>sed</sub>), and the respiration rate of labile DOC (R<sub>DOCL</sub>). Standard deviations for parameter uncertainty distributions are equal to 20% of the values.

| Lake | IP ( $gCd^{-1}(Wm^{-2})^{-1}$ ) | R <sub>sed</sub> ( $day^{-1}$ ) | R <sub>DOCL</sub> ( $day^{-1}$ ) |
|------|---------------------------------|---------------------------------|----------------------------------|
| ME   | 0.055                           | 0.40                            | 0.020                            |
| MO   | 0.055                           | 0.40                            | 0.020                            |
| TR   | 0.020                           | 0.15                            | 0.015                            |
| AL   | 0.020                           | 0.10                            | 0.015                            |
| BM   | 0.020                           | 0.10                            | 0.015                            |
| SP   | 0.020                           | 0.12                            | 0.015                            |

**Supplemental Table 5** Manually calibrated values that vary across lake systems. These include the fitting coefficient for light extinction of DOC (LEC\_doc), maximum daily productivity (Pmax), inflow concentrations for recalcitrant DOC (DOCR\_in), the inflow concentrations for recalcitrant POC (POCR\_in), and initial condition concentrations for DOCR, DOCL, and POCR (DOCR initial, DOCL initial, POCR initial). MO does not have set DOCR\_in or POCR\_in values because they are computed from the outflow of ME. The initial condition POCL concentration was zero for all lakes.

| Lake | LEC_doc<br>( $m^2 g^{-1}$ ) | Pmax<br>( $g m^{-3} day^{-1}$ ) | DOCR_in<br>( $g m^{-3}$ ) | POCR_in<br>( $g m^{-3}$ ) | DOCR<br>initial<br>( $g m^{-3}$ ) | DOCL<br>initial<br>( $g m^{-3}$ ) | POCR<br>initial<br>( $g m^{-3}$ ) |
|------|-----------------------------|---------------------------------|---------------------------|---------------------------|-----------------------------------|-----------------------------------|-----------------------------------|
| ME   | 0.02                        | 5.0                             | 10.0                      | 2.0                       | 5                                 | 0                                 | 0.5                               |
| MO   | 0.02                        | 5.0                             | NA                        | NA                        | 5                                 | 0                                 | 0.5                               |
| TR   | 0.03                        | 0.5                             | 5.0                       | 6.0                       | 2.5                               | 0.5                               | 0.2                               |
| AL   | 0.06                        | 1.5                             | 4.0                       | 2.0                       | 3                                 | 0                                 | 0.2                               |
| BM   | 0.02                        | 0.5                             | 7.0                       | 2.0                       | 3.5                               | 0.5                               | 0.2                               |
| SP   | 0.02                        | 1.5                             | 8.0                       | 3.0                       | 3.5                               | 0.5                               | 0.2                               |

## FIGURES

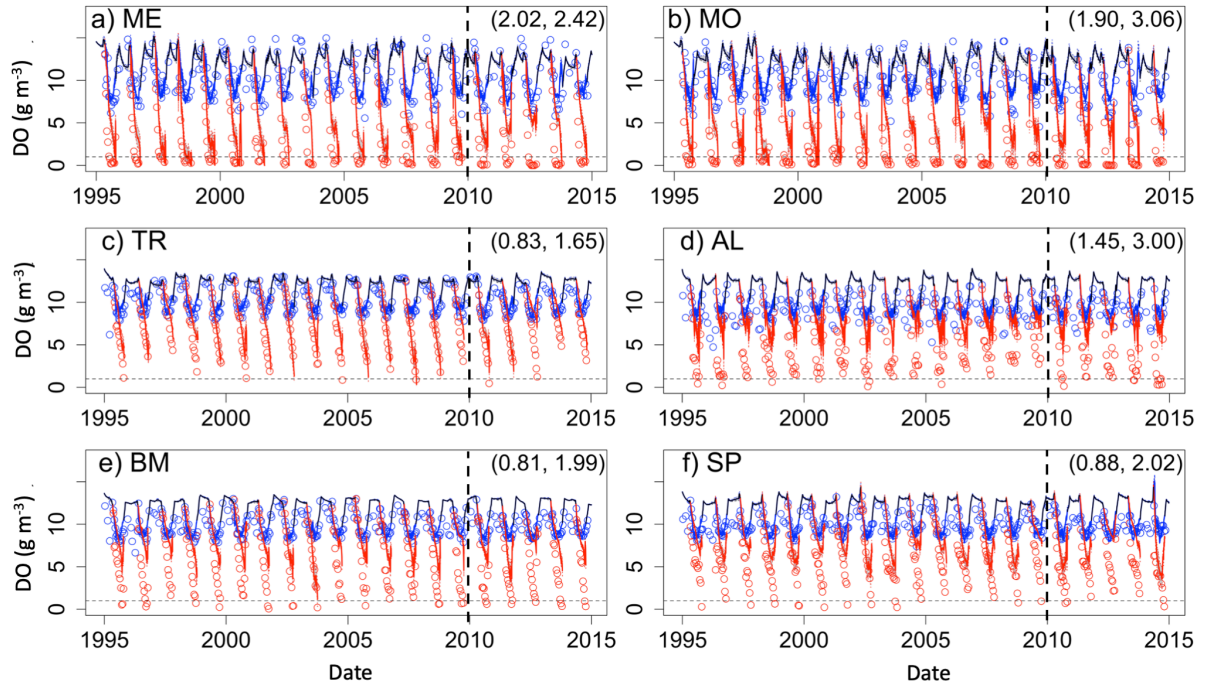

**Supplemental Figure 1.** Dissolved oxygen (DO) time series for the years for all years. Model predictions are represented by lines, and points represent the observational data. Epilimnetic DO values are indicated in blue and Hypolimnetic DO values are indicated in red. RMSE values (Epi,Hypo) are included in the upper right of each panel. The calibration period (1995-2010) and validation period (2010-2015) are separated by a vertical dashed black line. Uncertainty is represented by gray shading.

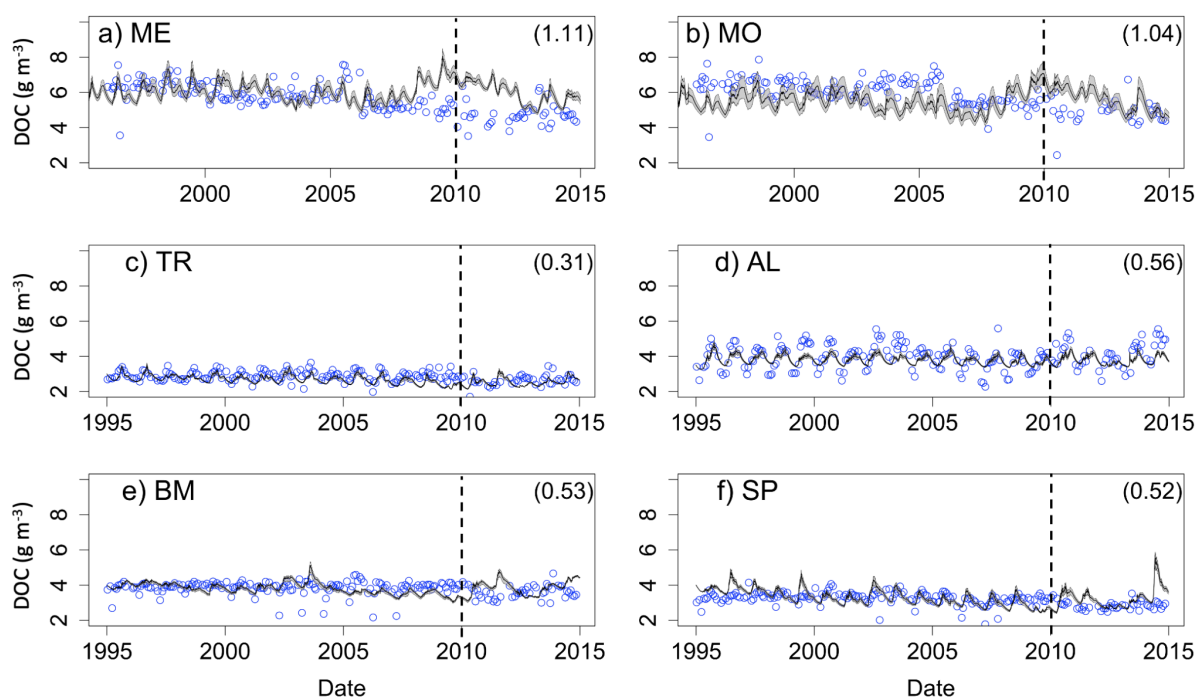

**Supplemental Figure 2.** Dissolved organic carbon (DOC) time series for all years. Model predictions are represented by lines, and points represent the observational data. RMSE values are included for each lake. The calibration period (1995-2009) and validation period (2010-2014) are separated by a vertical dashed black line. Uncertainty is represented by gray shading.

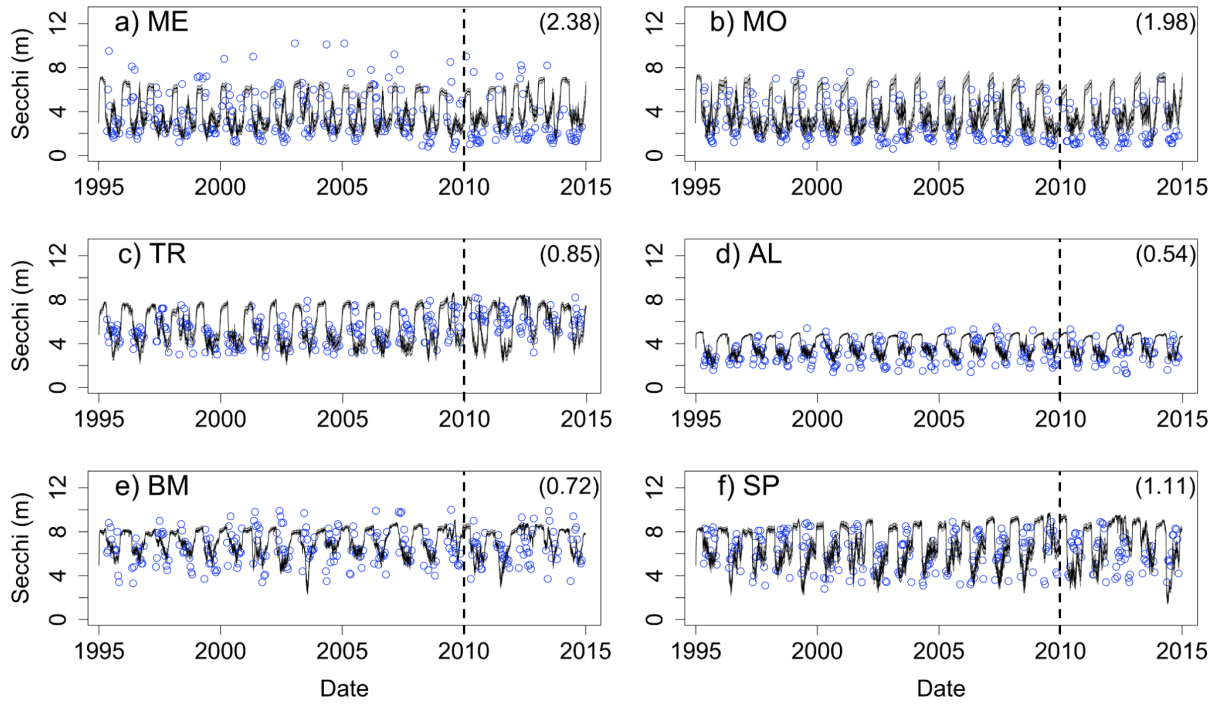

**Supplemental Figure 3.** Secchi Depth time series for the all years. Model predictions are represented by lines, and points represent the observational data. RMSE values are included for each lake. The calibration period (1995-2009) and validation period (2010-2014) are separated by a vertical dashed black line. Uncertainty is represented by gray shading.

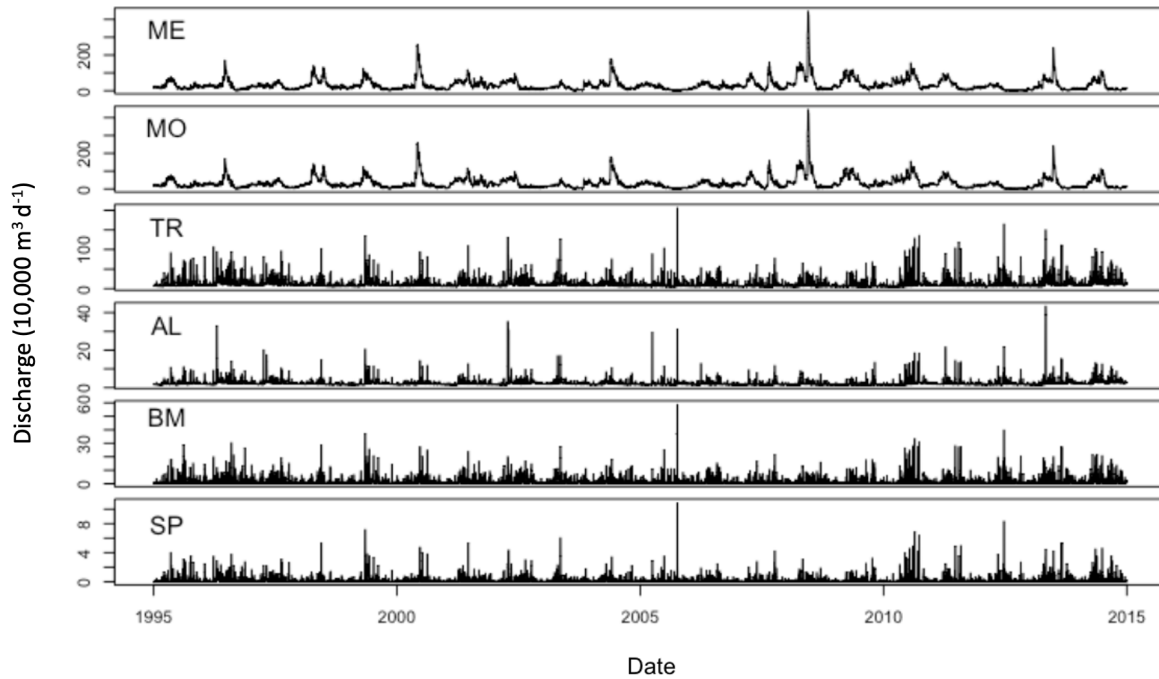

**Supplemental Figure 4.** Derived lake discharge information for inflow hydrology over the full time series. Note that the y-axis values are in units of  $10,000 \text{ m}^3 \text{ d}^{-1}$ .

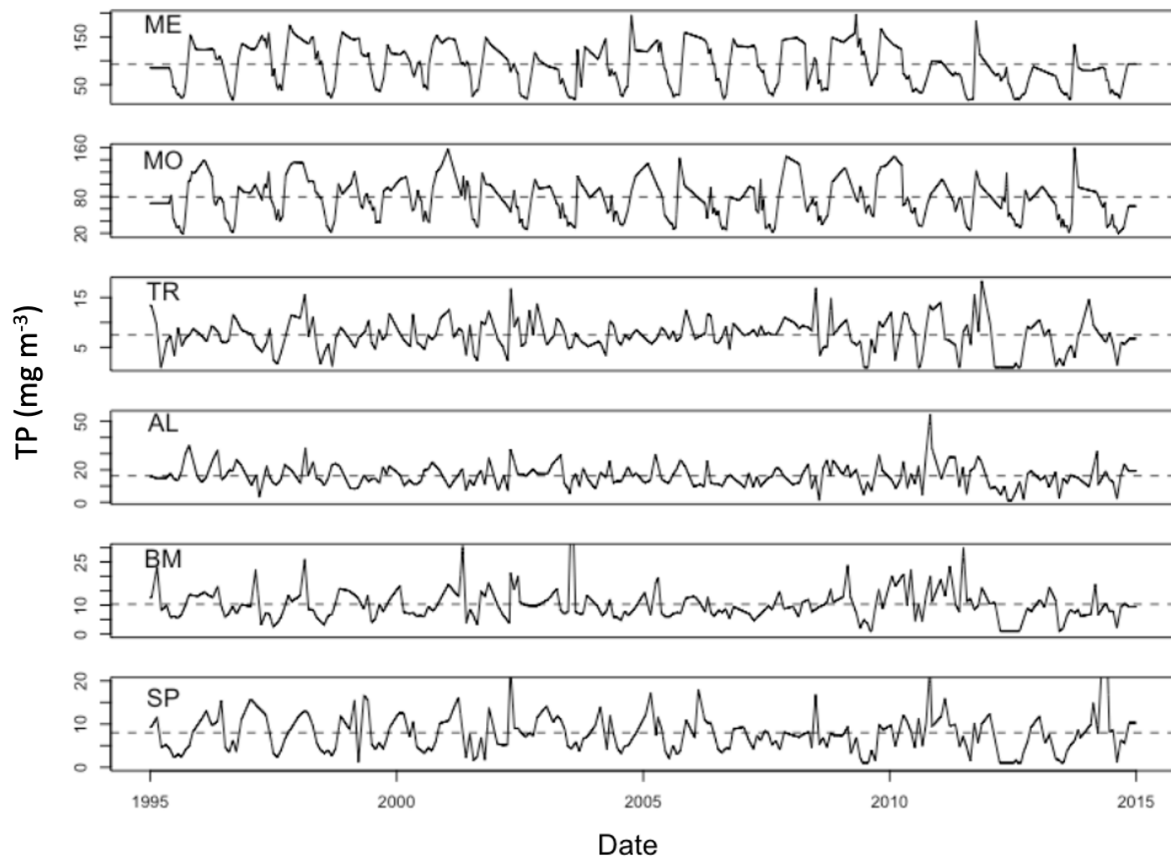

**Supplemental Figure 5.** Total phosphorus concentrations [mg m<sup>-3</sup>] over the full time series. Values are interpolated to a daily time step from observational data. The long term mean for total phosphorus is also plotted for each lake (dashed line).

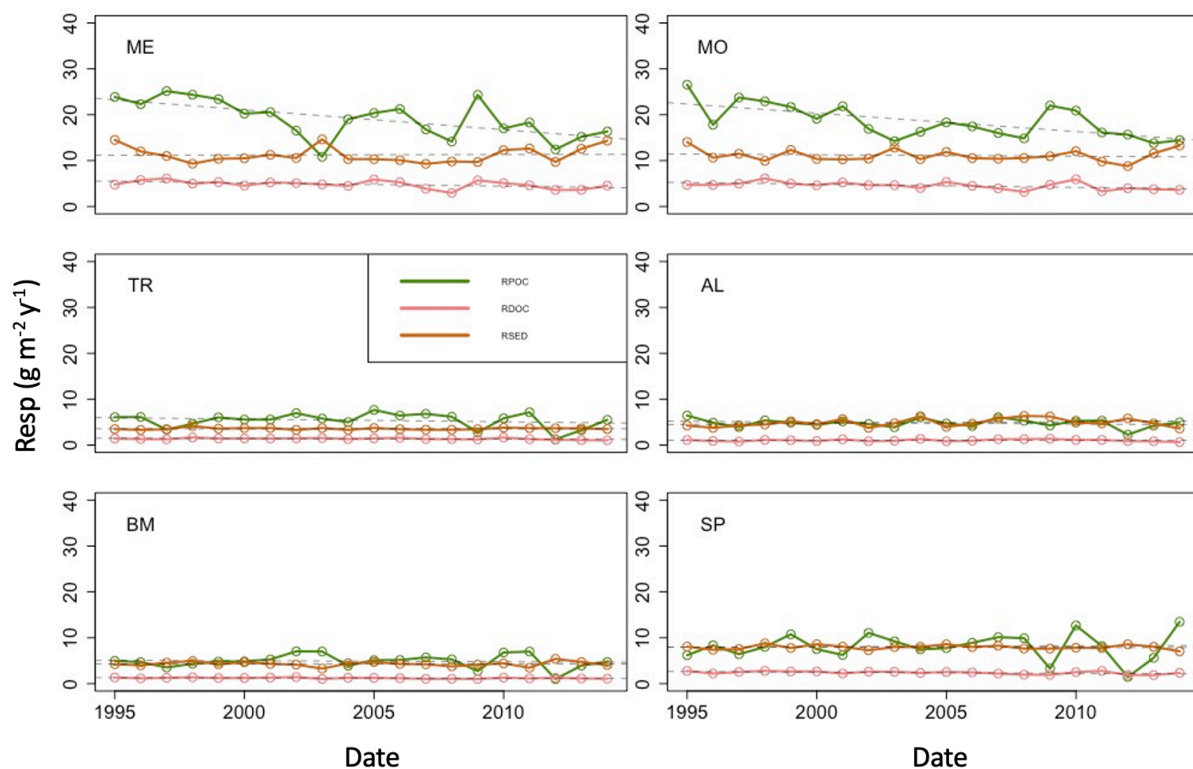

**Supplemental Figure 6.** Annual hypolimnetic OC respiration values over the full 20 year time series with associated trend lines (dashed). Components include POC water column respiration (green), DOC water column respiration (pink), and sediment respiration (orange).
